# Supplementary material
Source: Preprints.org preprint supplement (doi:10.20944/preprints202002.0032.v1)
Supplement: Supplementary file 1 [file supplementary]

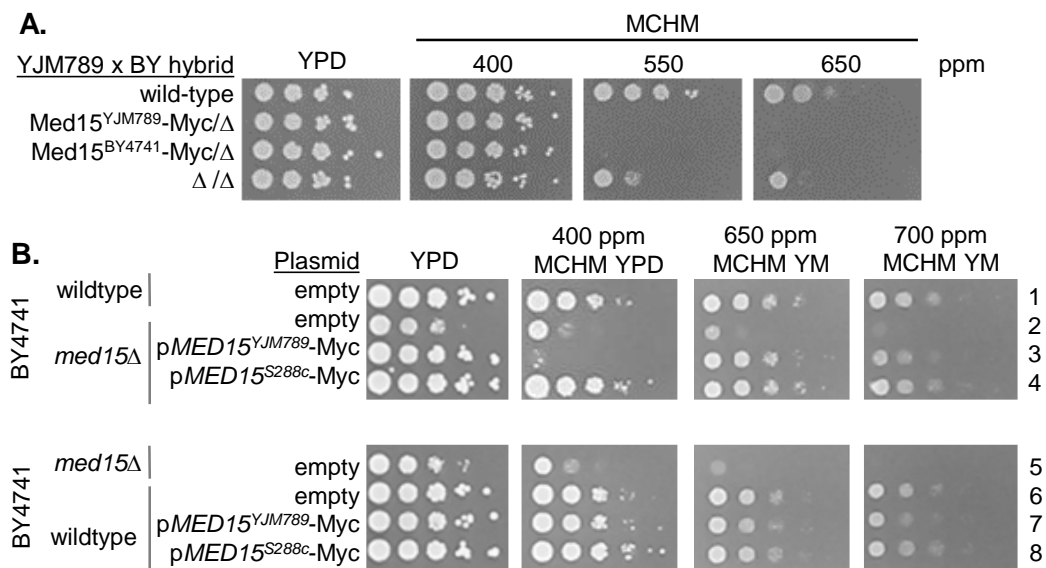

**Figure S1 Gallagher**

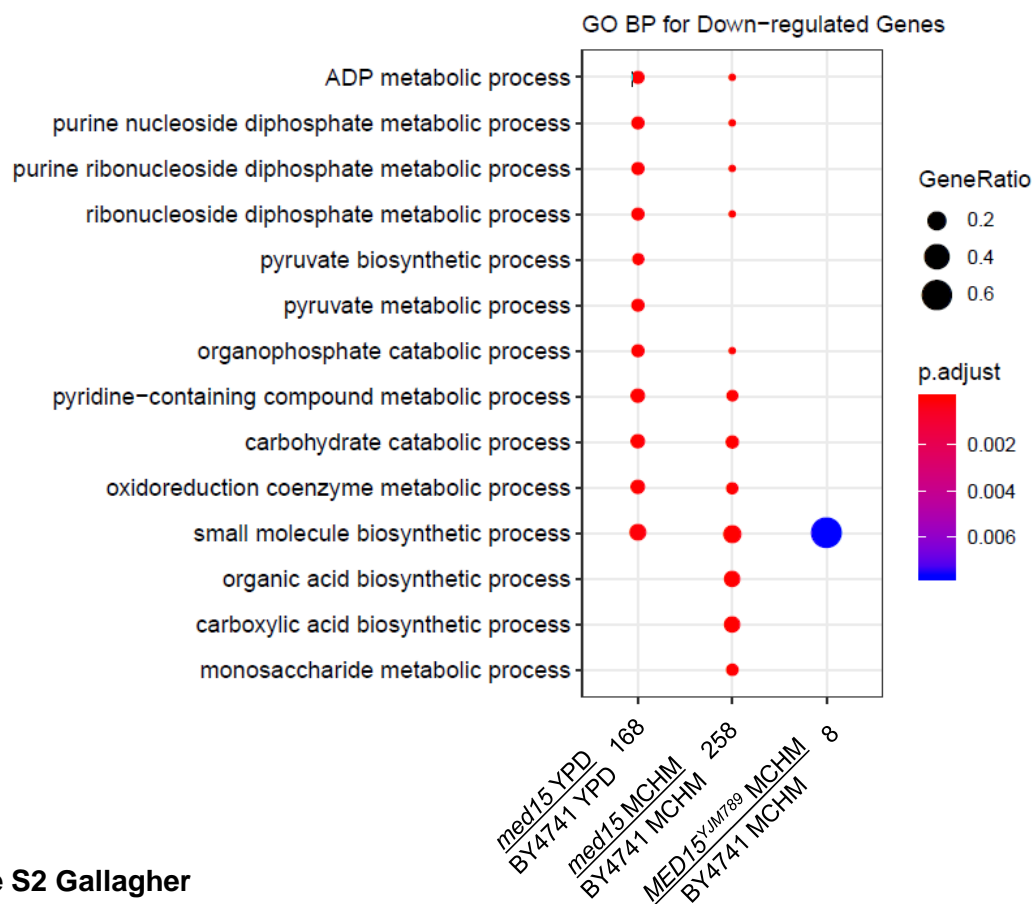

Figure S2 Gallagher

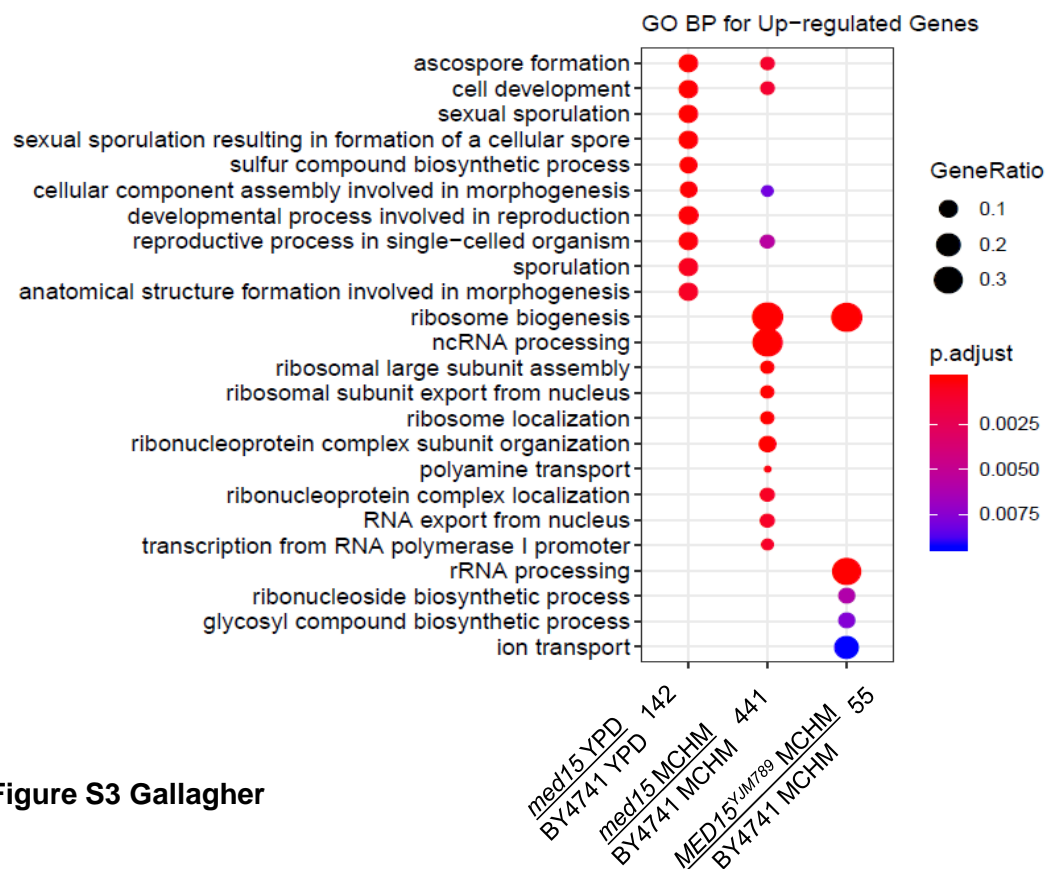

Figure S3 Gallagher

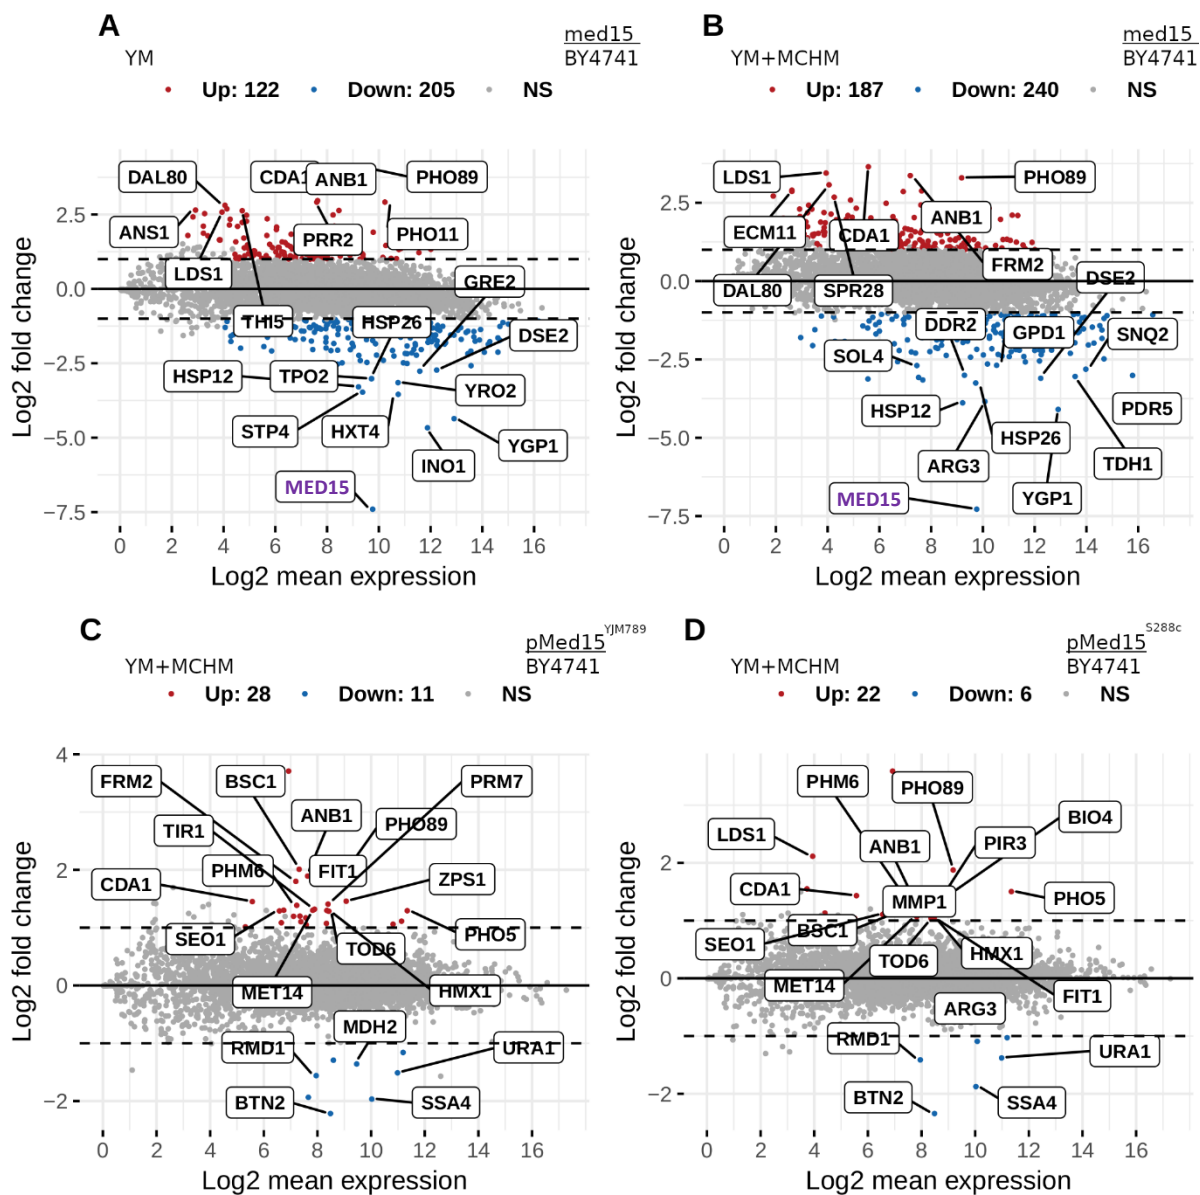

**Figure S4 Gallagher**

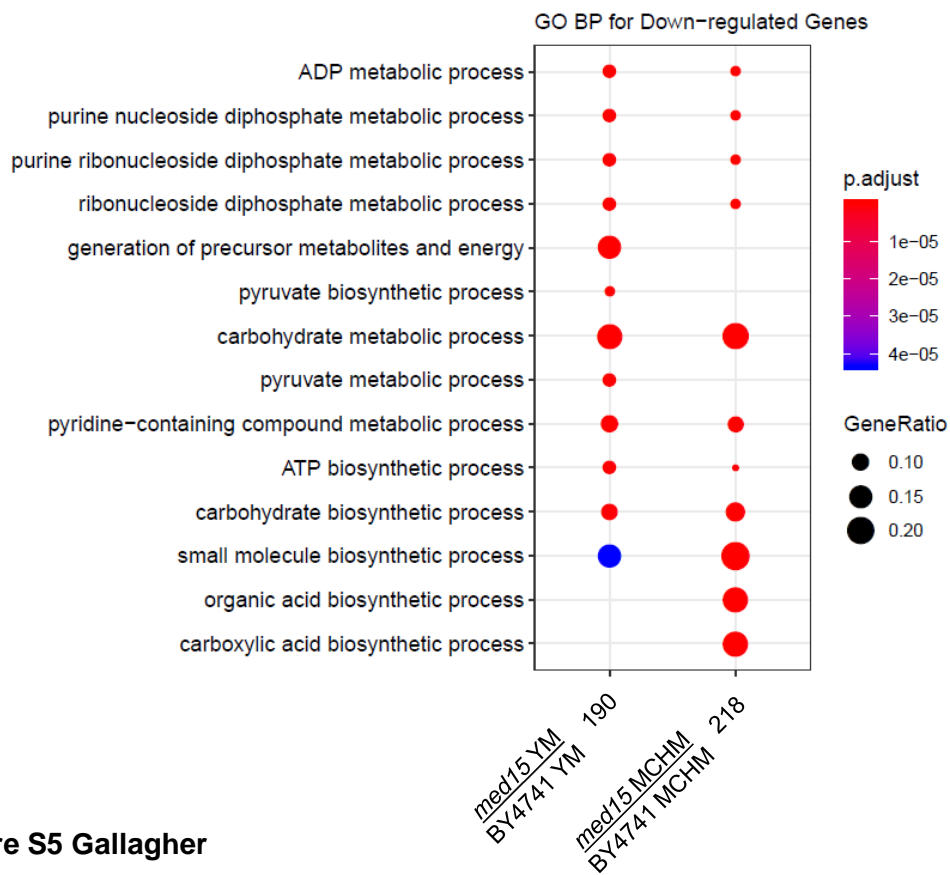

Figure S5 Gallagher

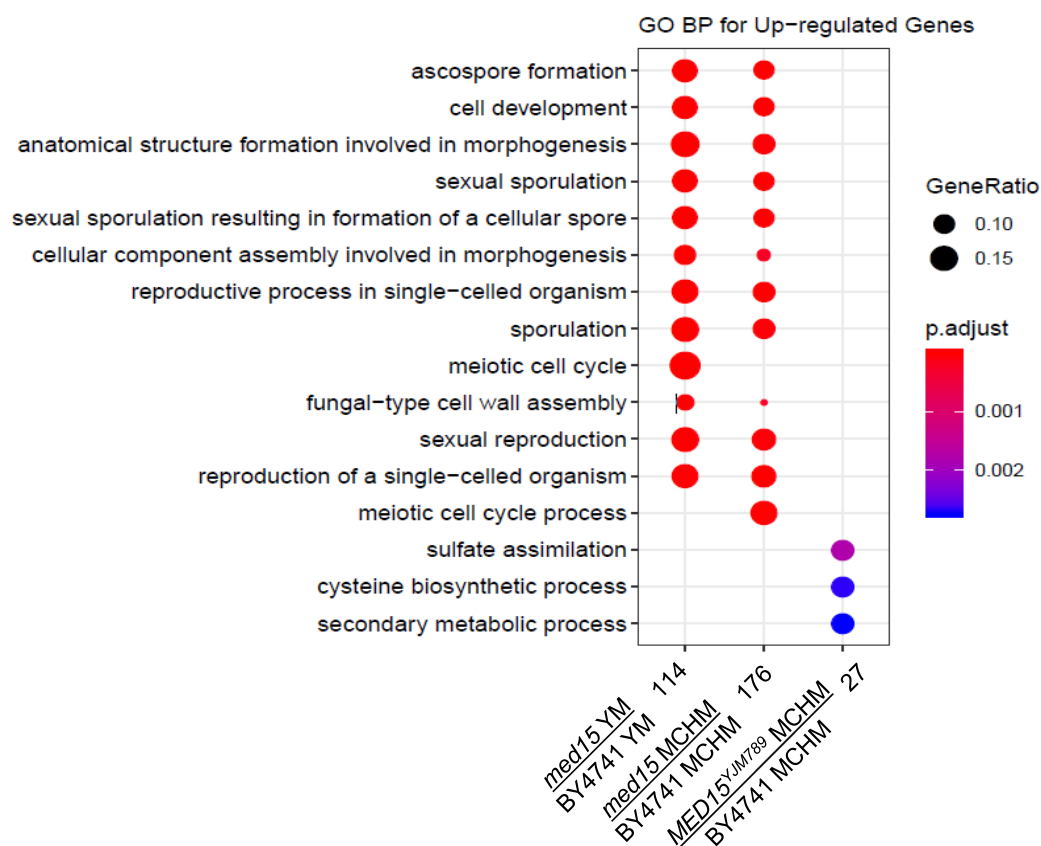

Figure S6 Gallagher

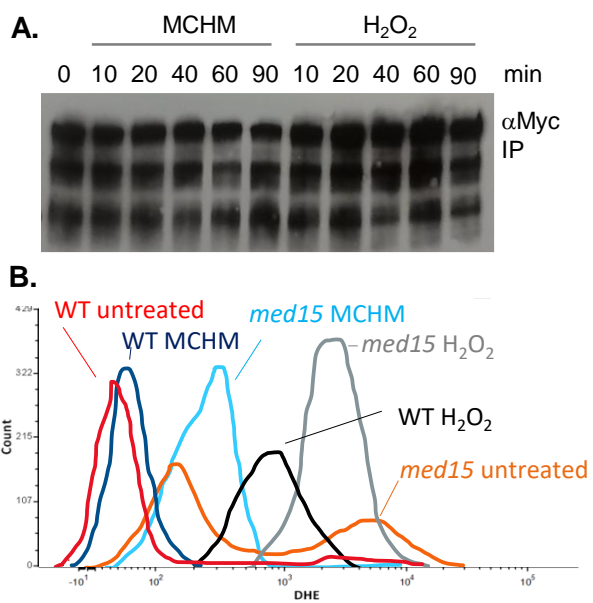

**Figure S7 Gallagher**

**A.**

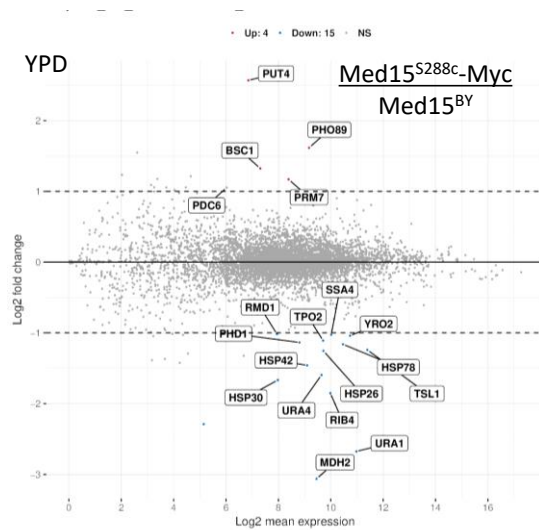

**B.**

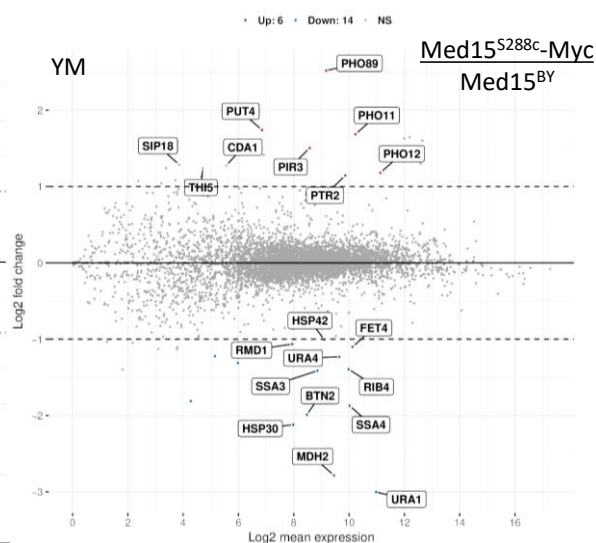

**C.**

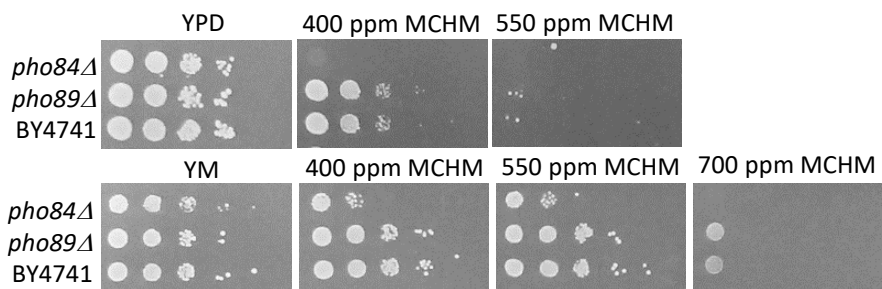

**D.**

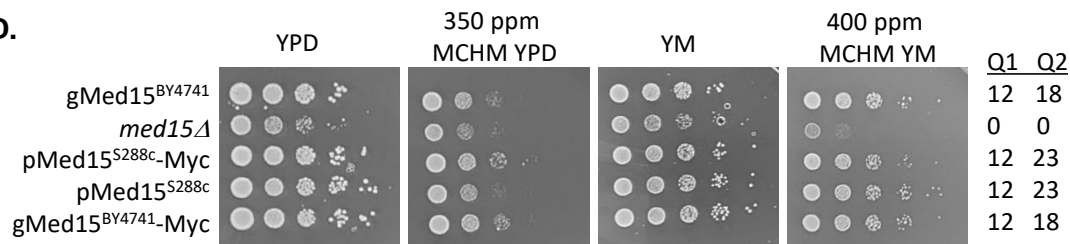

**Figure S8 Gallagher**
