# Supplementary material
Source: Preprints.org preprint supplement (doi:10.20944/preprints202002.0032.v1)
Supplement: Supplementary file 2 [file Table S3 Gallagher Med15 primer list.docx]

| # | name | -/+ | note | 5’ to 3’ |
| --- | --- | --- | --- | --- |
| 4.38 | 3’KanB | 151 | KO check | ATGTACGGGCGACAGTCACATCAT |
| 5.56 | 3’MycB | 566 | Myc check | GTGGCGCGAATTCACTAGTG |
| 8.92 | 5’Med15KO |  | Knockout | TCAAAGATCAAGGATTAAAACGCTATTTCTTTTAAATCTGCTCAGCTGAAGCTTCGTACGC |
| 8.93 | 5’Med15 C-Myc |  | tagging | CAATTCAATGTATGGGATTGGAATAATTGGACAAGTGCTACT TTA ATT AAC GGT GAA CA |
| 8.94 | 3’Med15S288ctag&KO |  | Tagging and knockout | AGTAACTTCAAAAGTATCAAAAGTATGGAAACTTCAAATGTTTACGACTCACTATAGGGA |
| 8.95 | 5’Med15a | -141 | KO check | AAGTACTTCCACGACATTGC |
| 8.96 | 5’Med15c | 3202 | Myc check | TTCTGGGACTAGTTCAGAAC |
| 9.17 | 3’Med15789tag&KO |  | Tagging and knockout | CACCAAACGAAGTAACTTCAAAAGTATGGAAACTTCAAATGTTACGACTCACTATAGGGA |
| 9.56 | 5’Med15 cloning | -499 | NotI | TGGCGGCCGCTAACAAGCAATTACATATTCC |
| 9.65 | 5’Med15+295 | 319 | QI insert | CCGTGGAACAGCACCATATTAACA |
| 9.68 | 3’Med15+754 | 721 | QI insert | CTTGAGCCTGTGCTTGTTGT |
| 9.66 | 3’Med15+399 | 397 | -QI vector | GCTGATTCAAGAACATCTGTGGGTTTAG |
| 9.67 | 5’Med15_Q2 | 541 | -QI vector | GTGGCACCTATTCCCAAAC |
| 11.18 | 5’Med15+574 | 1916 | QII insert | GCAAATGGCAAACAACAATGG |
| 9.69 | 3’Med15end | 3239 | QII insert | GCACTTGTCCAATTATTCCAATCCC |
| 11.19 | 3’Med15_Q2 | 1936 | -QII vector | TAGAAGTAGTGCCTGGGTTC |
| 8.96 | 5’Med15c | 3202 | -QII vector | TTCTGGGACTAGTTCAGAAC |
|  |  |  |  |  |
